# Supplementary material for: Understanding the Effects of Electric Fields on Molecules through Gradient Path Curvature
Source: Research Square preprint supplement (doi:10.21203/rs.3.rs-7383478/v1), 2025-08-29
Supplement: Supplementary file 1 [file 0bc8c36f8f3cb96156d52005.pdf]

Understanding the Effects of Electric Fields on  
Molecules through Gradient Path Curvatures  
*Supplementary Information*

Nikodemos Hughes<sup>1</sup>, Charles Morgenstern<sup>2</sup>,  
Amanda Morgenstern<sup>1\*</sup>

<sup>1</sup>Chemistry & Biochemistry, University of Colorado Colorado Springs,  
1420 Austin Bluffs Parkway, Colorado Springs, 80918, CO, USA.

<sup>2</sup>Colorado Springs, CO, USA.

\*Corresponding author(s). E-mail(s): [amorgens@uccs.edu](mailto:amorgens@uccs.edu);

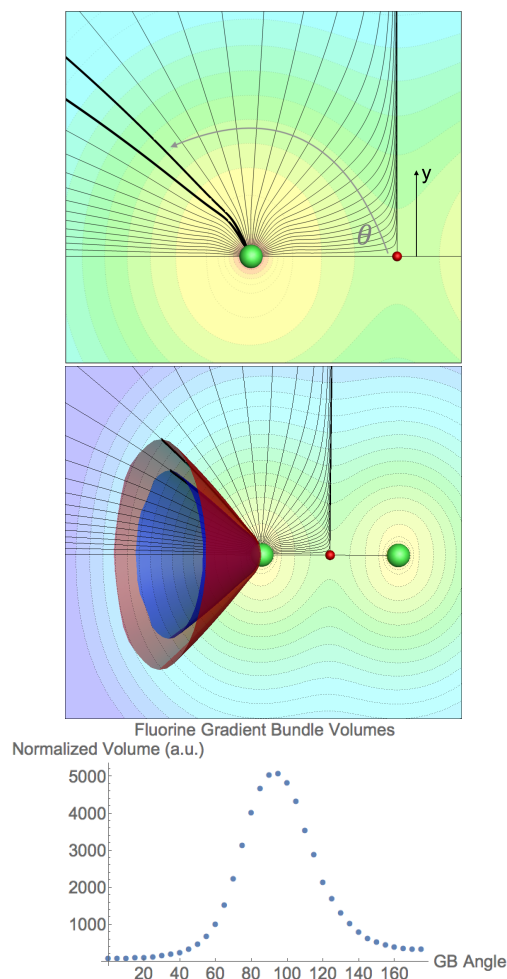

**Fig. S1** Construction of a rotational gradient bundle around one fluorine nucleus in  $F_2$ . Top: Gradient paths seeded every  $5^\circ$  around the top half of a nucleus in the plane of the molecule as shown by the angle  $\theta$ . Middle: ZFSs bounding GBs are created by rotating two neighboring GPs around the bond axis. Green sphere, nuclear CP; Red sphere, bond CP. Contours indicate values of  $\rho(\mathbf{r})$ . Bottom: Normalized volumes of GBs in one atomic basin of  $F_2$ .

Fig. S1 shows the (intensive) properties of rotational GBs are a function only of the angle,  $\theta$ , generating a 1D property distribution, where  $\theta$  is the angle between a GP at its initial seed point and the bond path. Numerical integrations of rotational GBs are calculated by integrating  $A * 2\pi y$  where  $A$  is the property of interest ( $\rho(\mathbf{r})$ , kinetic energy, etc.) at a point in the 2D slice of the GB through the molecule and  $y$  is the distance of the point from the bond path along the y-direction. Due to the rotation around the internuclear axis, the size of GBs varies throughout each atomic basin. Normalized volumes are calculated by taking the volume of each gradient bundle and dividing by the volume the bundle would have if the charge density were spherical.

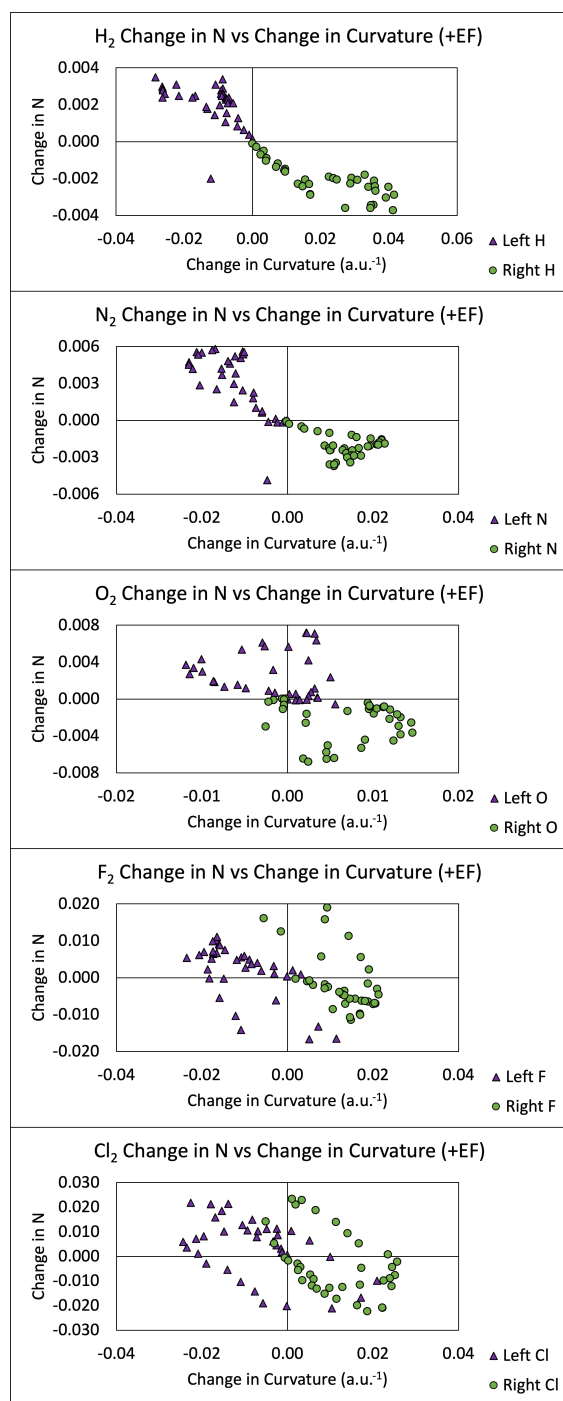

**Fig. S2** Plots of  $\Delta N$  vs.  $\Delta \kappa$  with a 1 V/Å EF applied along the bonds from the left to right atom in homonuclear diatomics

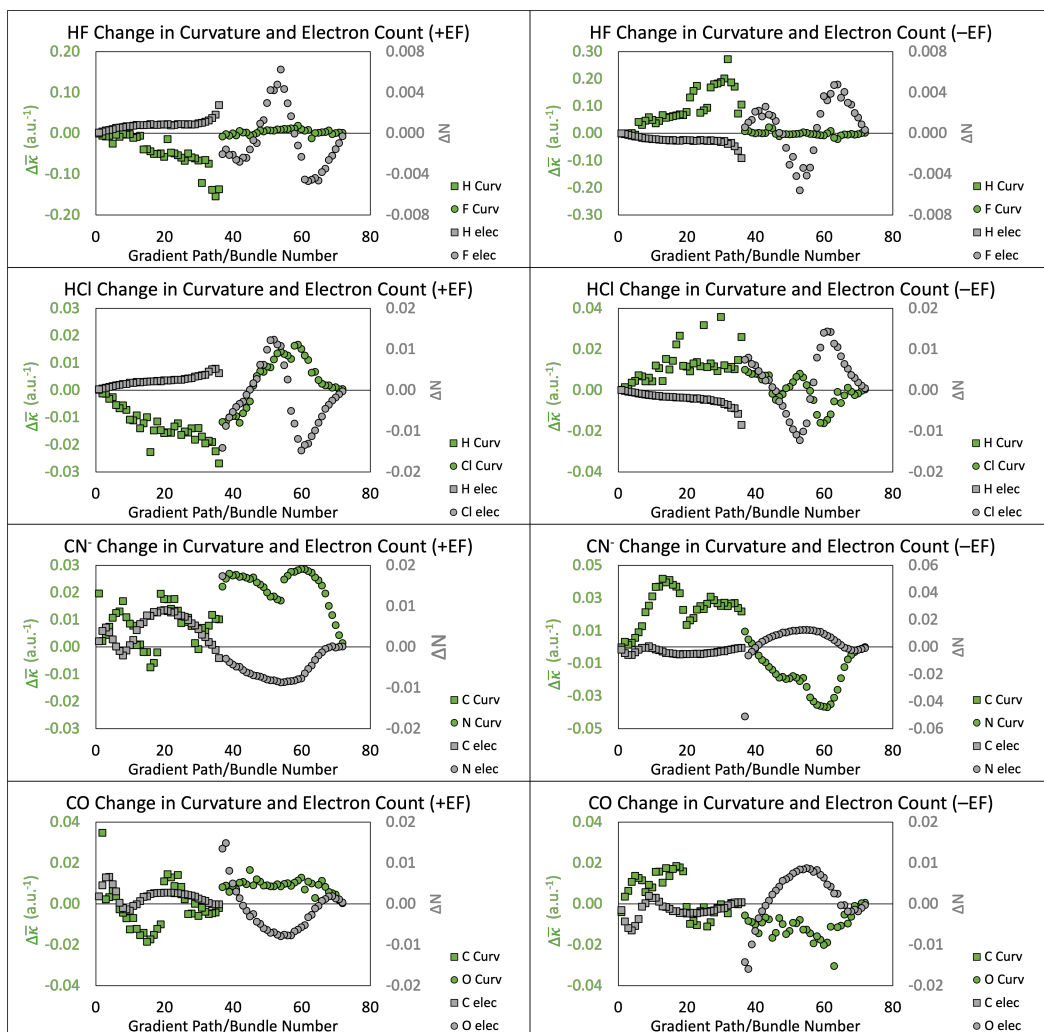

**Fig. S3** Changes in gradient path  $\bar{\kappa}$  and changes in GB electron counts,  $N$ , with a 1 V/Å EF applied along the bonds from the left to right atom in heteronuclear diatomic molecules

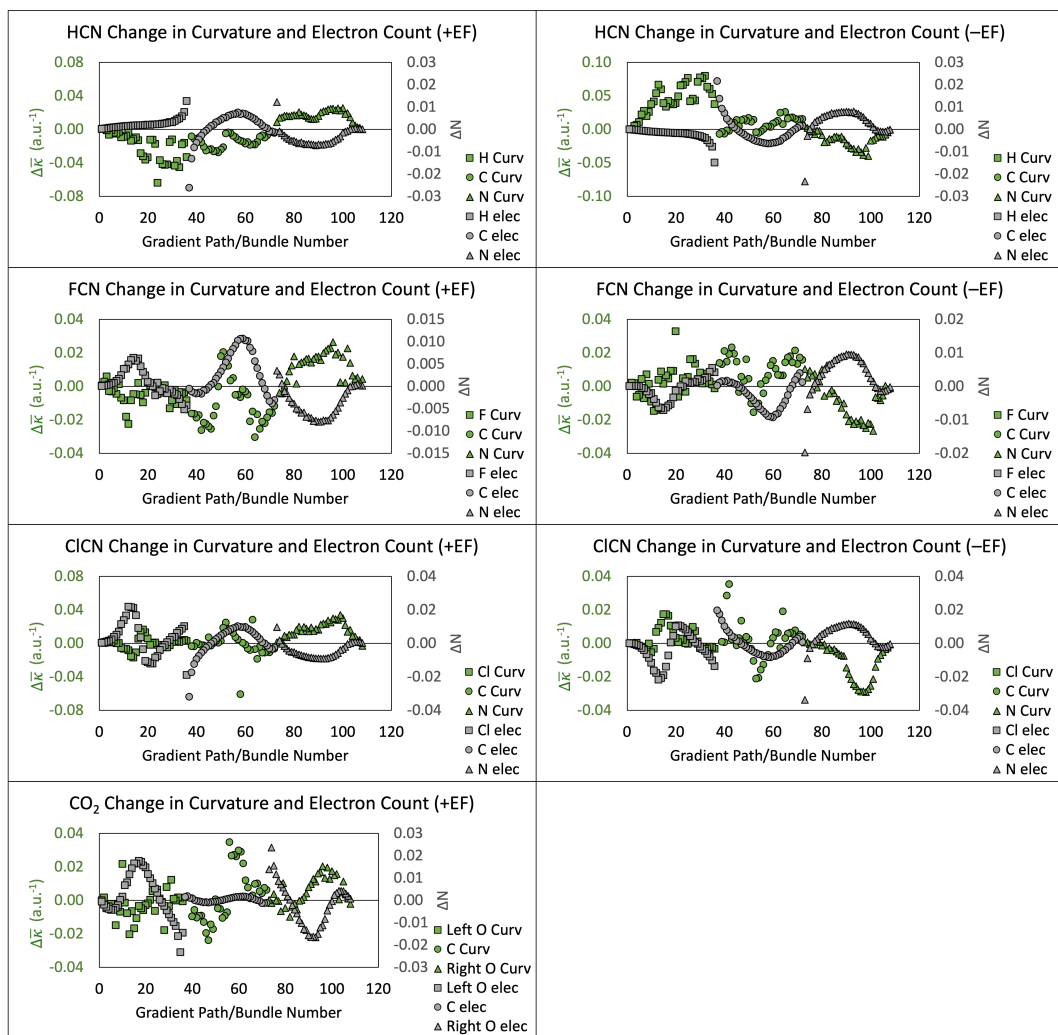

**Fig. S4** Changes in gradient path  $\bar{\kappa}$  and changes in GB electron counts,  $N$ , with a 1 V/Å EF applied along the bonds from the left to right atom in triatomic molecules

**Table S1** Average gradient path  $\Delta\bar{\kappa}$  and average changes in GB electron counts, N, with a 1 V/Å EF applied along the bonds. Data is organized by atom type.

| Molecule (EF)         | Atom     | Average $\Delta\bar{\kappa}$ (a.u. <sup>-1</sup> ) | Average $\Delta$ N |
|-----------------------|----------|----------------------------------------------------|--------------------|
| N <sub>2</sub>        | Left N   | -0.0115                                            | 0.0029             |
| N <sub>2</sub>        | Right N  | 0.0135                                             | -0.0029            |
| HCN (+EF)             | N        | 0.0159                                             | -0.0036            |
| FCN (+EF)             | N        | 0.0122                                             | -0.0037            |
| ClCN (+EF)            | N        | 0.0157                                             | -0.0044            |
| CN <sup>-</sup> (+EF) | N        | 0.0219                                             | -0.0046            |
| HCN (-EF)             | N        | -0.0151                                            | 0.0033             |
| HCN (-EF)             | N        | -0.0079                                            | 0.0034             |
| ClCN (-EF)            | N        | -0.0105                                            | 0.0039             |
| ClCN (-EF)            | N        | -0.0162                                            | 0.0038             |
| H <sub>2</sub>        | Left H   | -0.0122                                            | 0.0021             |
| H <sub>2</sub>        | Right H  | 0.0217                                             | -0.0021            |
| HF (+EF)              | H        | -0.0464                                            | 0.0008             |
| HCl (+EF)             | H        | -0.0127                                            | 0.0023             |
| HCN (+EF)             | H        | -0.0202                                            | 0.0024             |
| HF (-EF)              | H        | 0.0896                                             | -0.0007            |
| HCl (-EF)             | H        | 0.0116                                             | -0.0022            |
| HCN (-EF)             | H        | 0.0449                                             | -0.0024            |
| O <sub>2</sub>        | Left O   | -0.0016                                            | 0.0025             |
| O <sub>2</sub>        | Right O  | 0.0068                                             | -0.0025            |
| CO (+EF)              | O        | 0.0085                                             | -0.0017            |
| CO <sub>2</sub>       | Left O   | -0.0026                                            | 0.0015             |
| CO <sub>2</sub>       | Right O  | 0.0054                                             | -0.0017            |
| CO (-EF)F             | O        | -0.0110                                            | 0.0016             |
| F <sub>2</sub>        | Left F   | -0.0104                                            | 0.0017             |
| F <sub>2</sub>        | Right F  | 0.0128                                             | -0.0017            |
| HF (+EF)              | F        | 0.0025                                             | -0.0008            |
| FCN (+EF)             | F        | -0.0045                                            | 0.0008             |
| HF (-EF)              | F        | -0.0024                                            | 0.0007             |
| FCN (-EF)             | F        | 0.0029                                             | -0.0008            |
| Cl <sub>2</sub>       | Left Cl  | -0.0074                                            | 0.0038             |
| Cl <sub>2</sub>       | Right Cl | 0.0113                                             | -0.0038            |
| HCl (+EF)             | Cl       | 0.0034                                             | -0.0023            |
| ClCN (+EF)            | Cl       | -0.0005                                            | 0.0029             |
| HCl (-EF)             | Cl       | -0.0006                                            | 0.0022             |
| ClCN (-EF)            | Cl       | 0.0024                                             | -0.0039            |
| CO (+EF)              | C        | 0.0015                                             | 0.0017             |
| HCN (+EF)             | C        | -0.0144                                            | 0.0012             |
| FCN (+EF)             | C        | -0.0111                                            | 0.0029             |
| ClCN (+EF)            | C        | -0.0014                                            | 0.0007             |
| CN <sup>-</sup> (+EF) | C        | 0.0078                                             | 0.0042             |
| CO <sub>2</sub>       | C        | 0.0027                                             | 0.0002             |
| CO (-EF)              | C        | 0.0041                                             | -0.0016            |
| HCN (-EF)             | C        | 0.0082                                             | -0.0009            |
| HCN (-EF)             | C        | 0.0089                                             | -0.0026            |
| ClCN (-EF)            | C        | 0.0018                                             | -0.0005            |
| CN <sup>-</sup> (-EF) | C        | 0.0233                                             | -0.0037            |
